# Supplementary figures and images for: Homology-guided identification of a conserved motif linking the antiviral functions of IFITM3 to its oligomeric state
Source: eLife journal article supplement (doi:10.7554/elife.58537), 2020-10-28

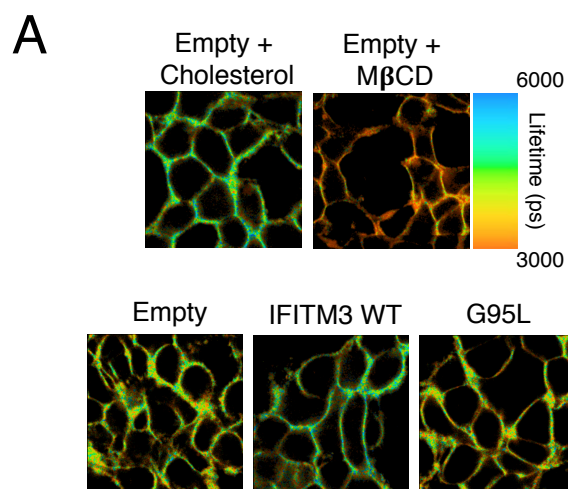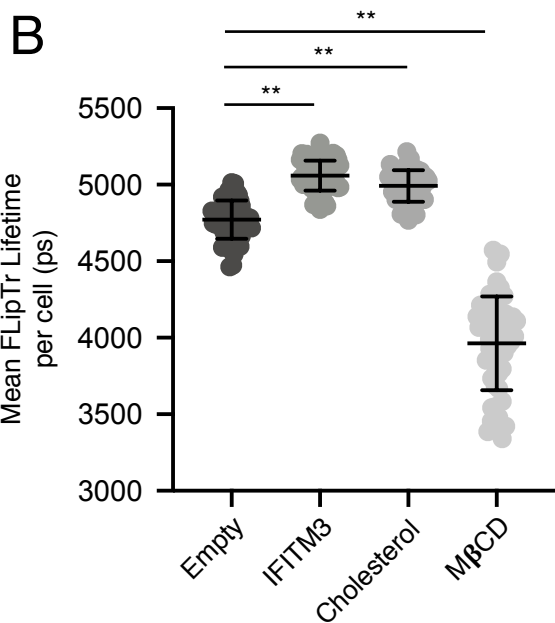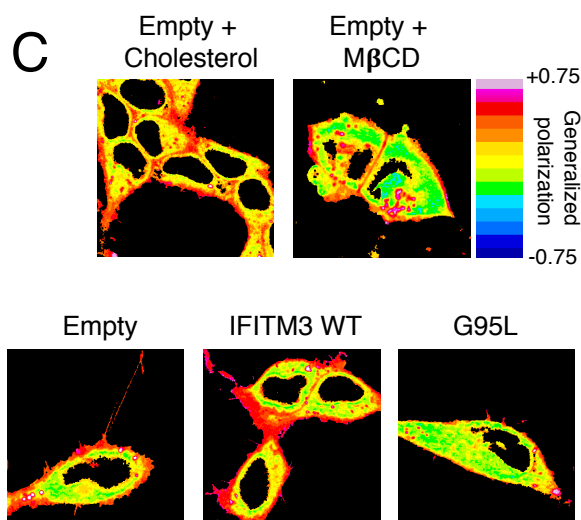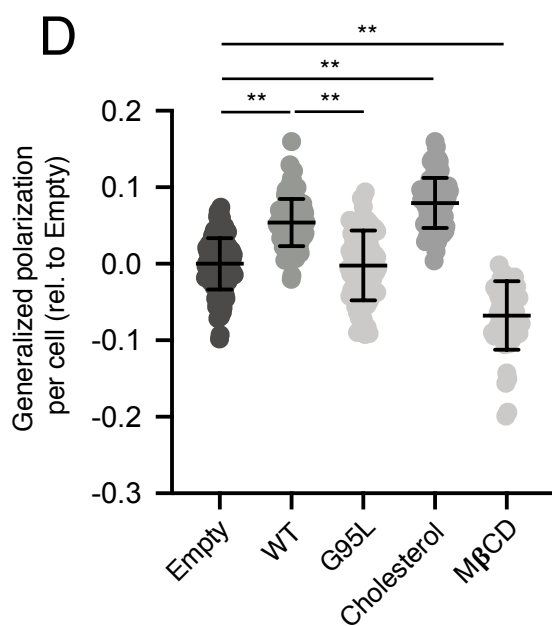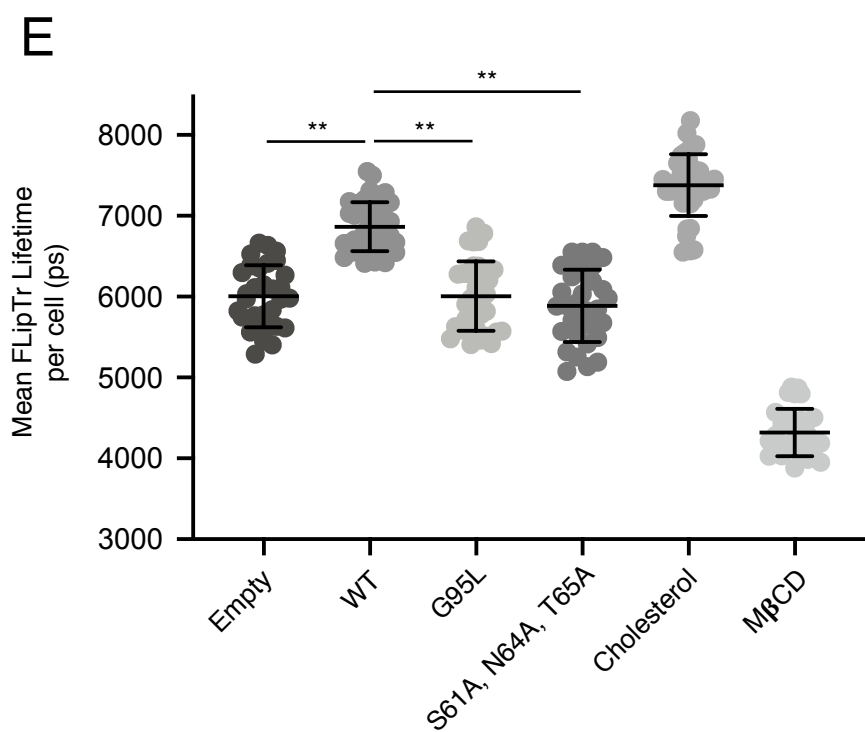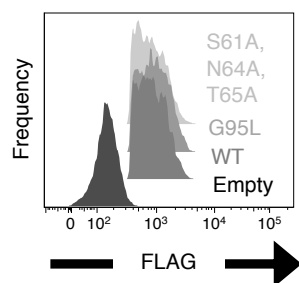

Supplement: supp [file elife-58537-supp-v1.zip]

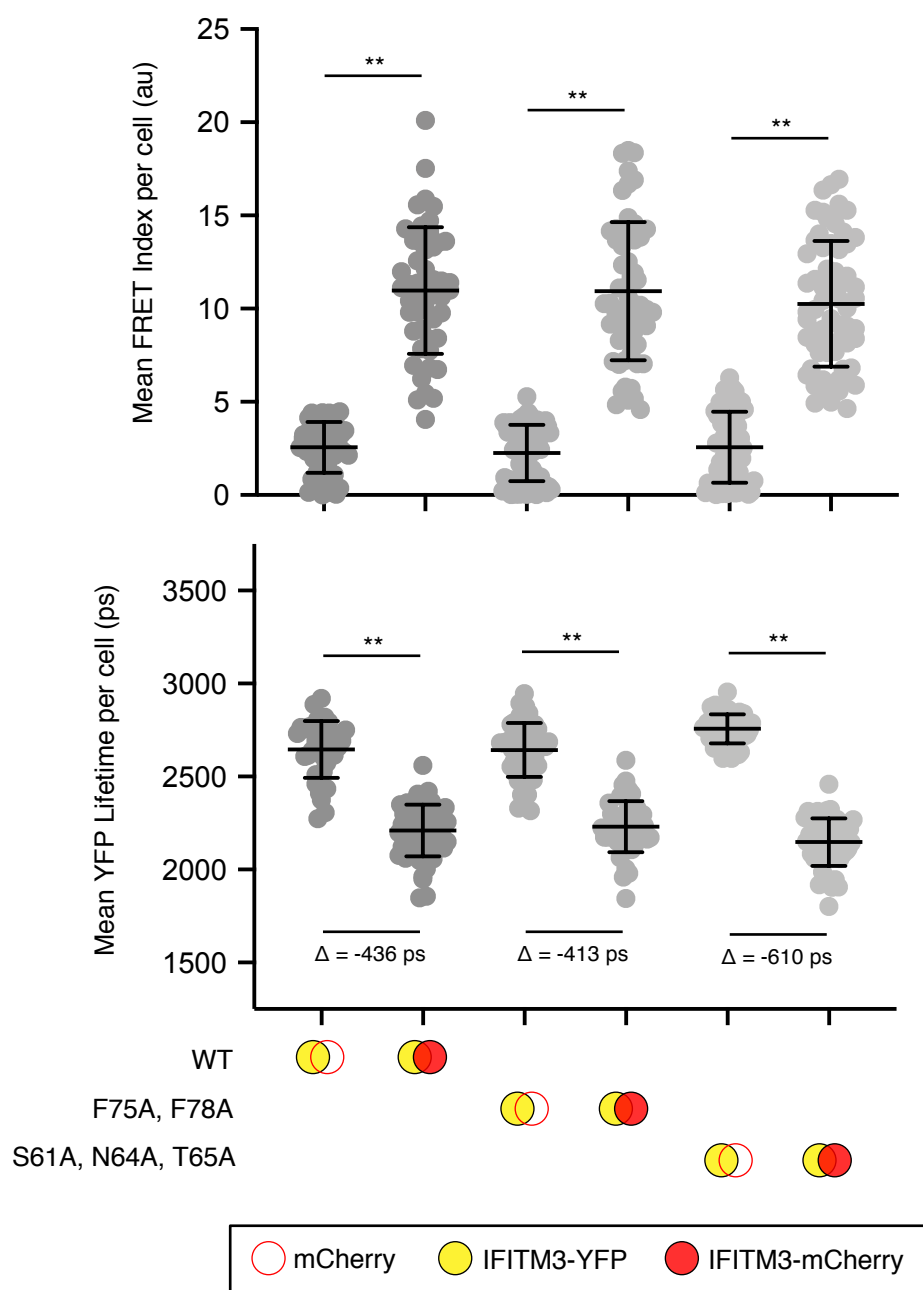

Supplement: supp [file elife-58537-supp-v1.zip]

A

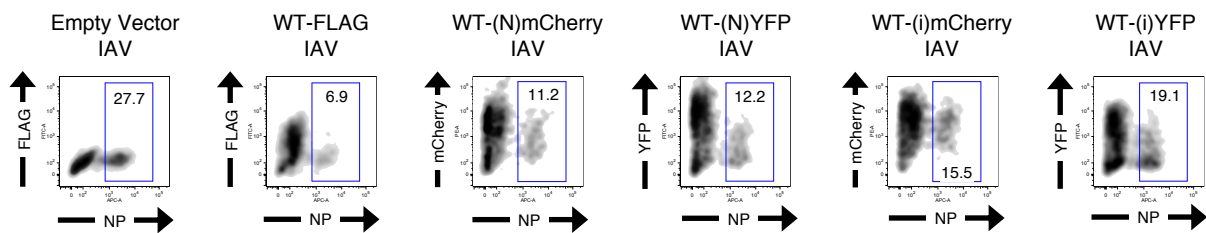

B

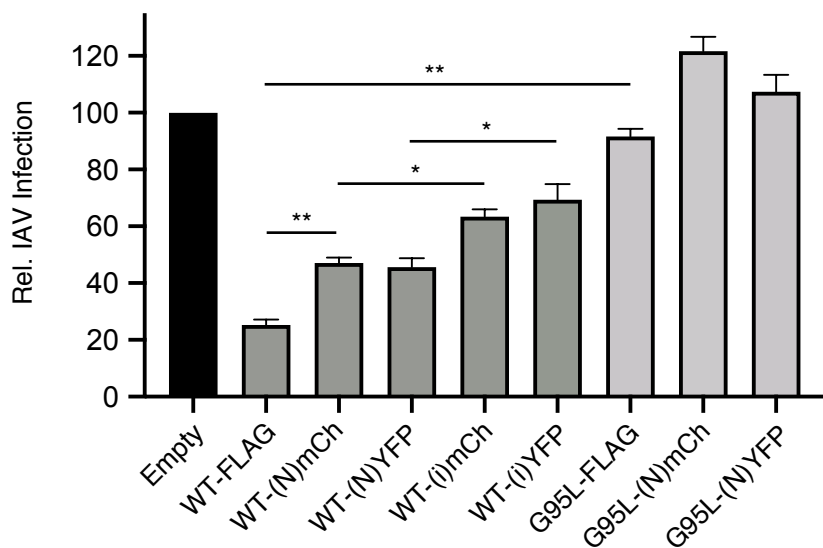

C

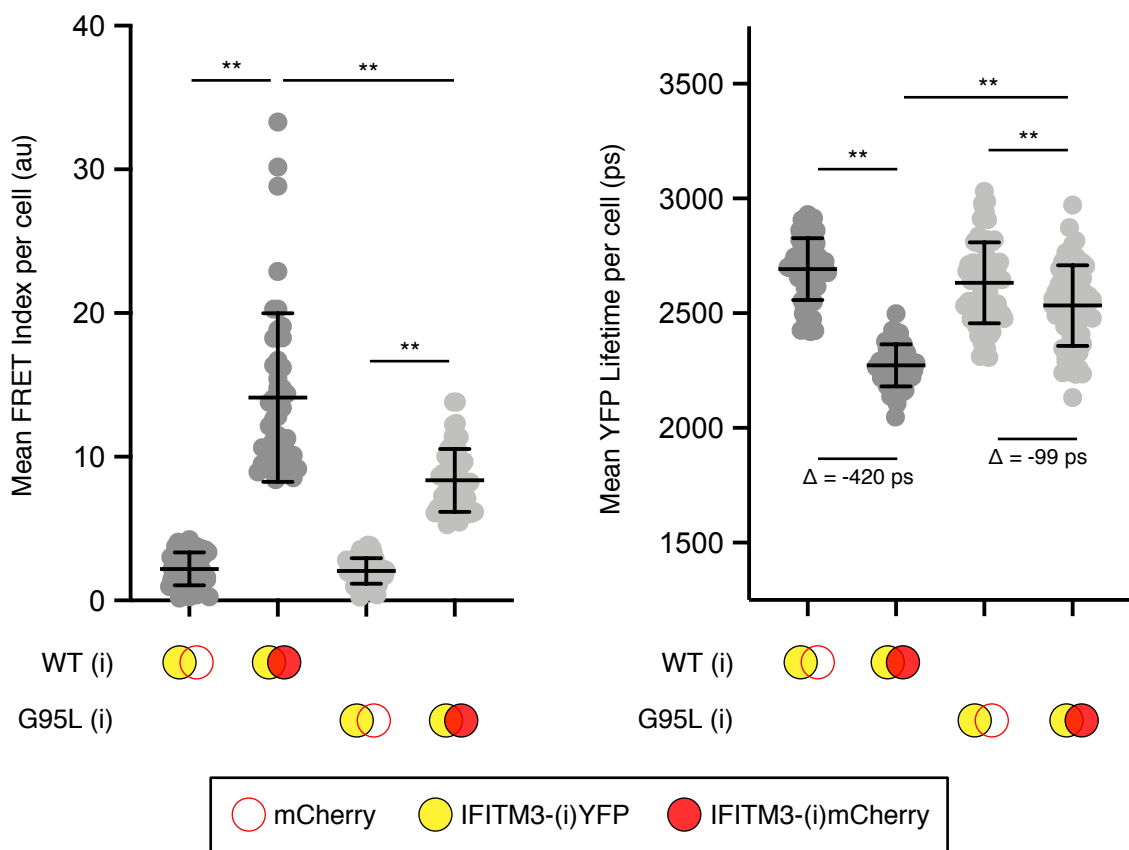

Supplement: supp [file elife-58537-supp-v1.zip]

**A**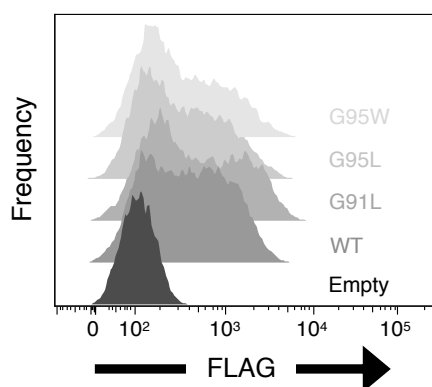**B**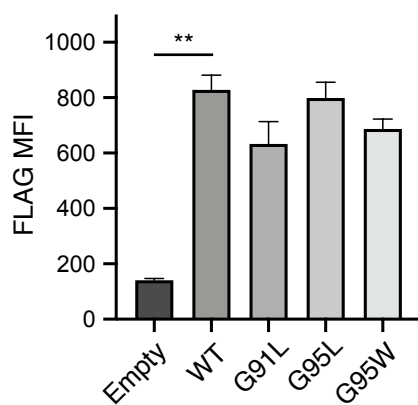**C**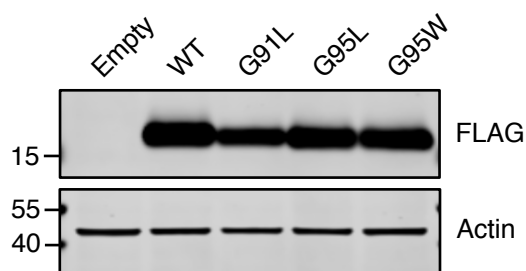**D**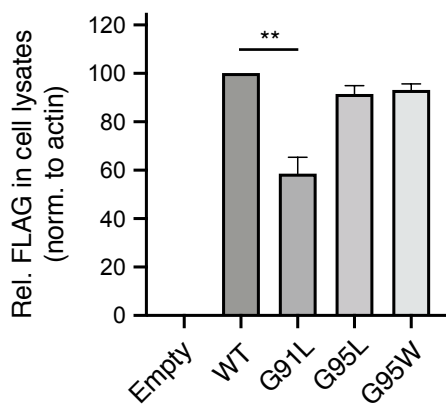**E**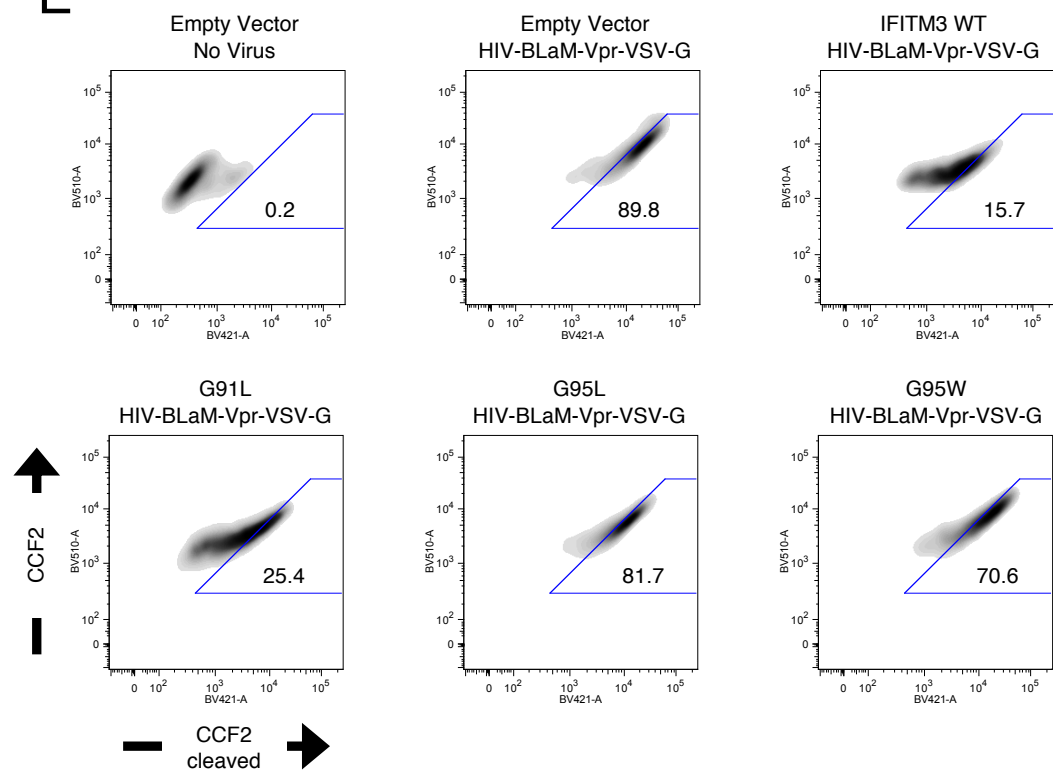

Supplement: supp [file elife-58537-supp-v1.zip]

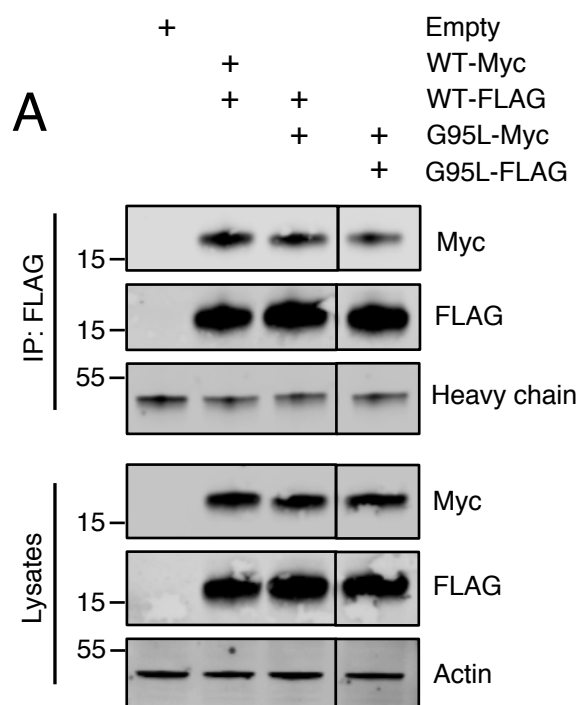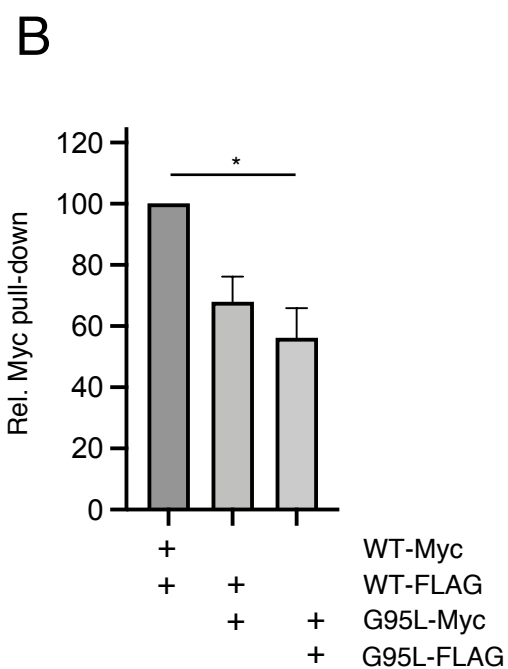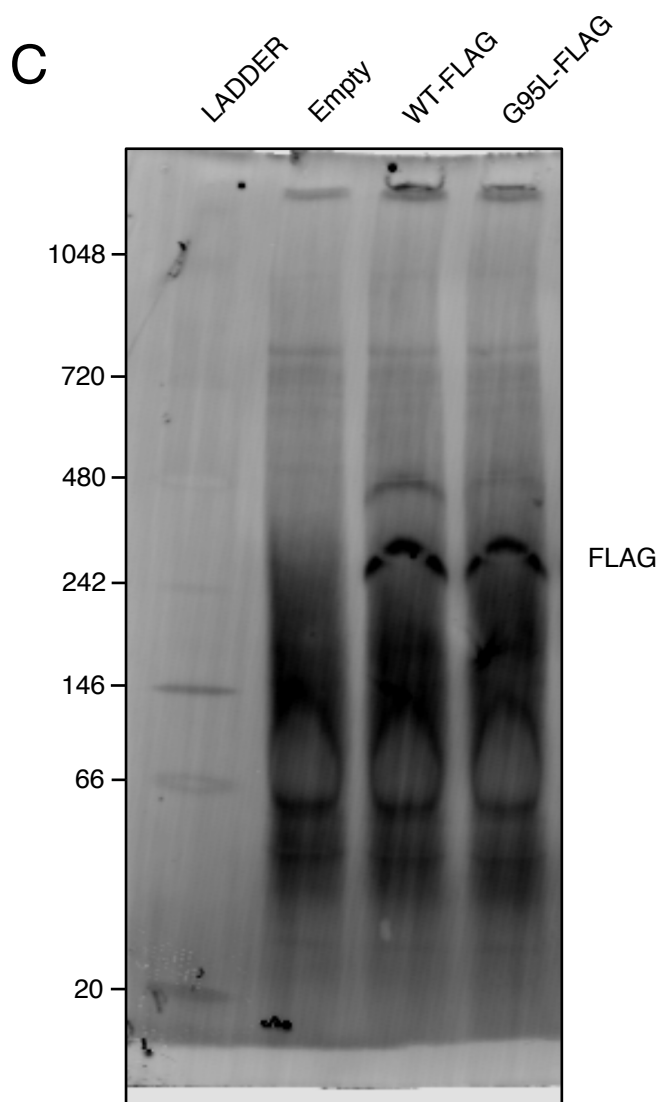

Supplement: supp [file elife-58537-supp-v1.zip]

A

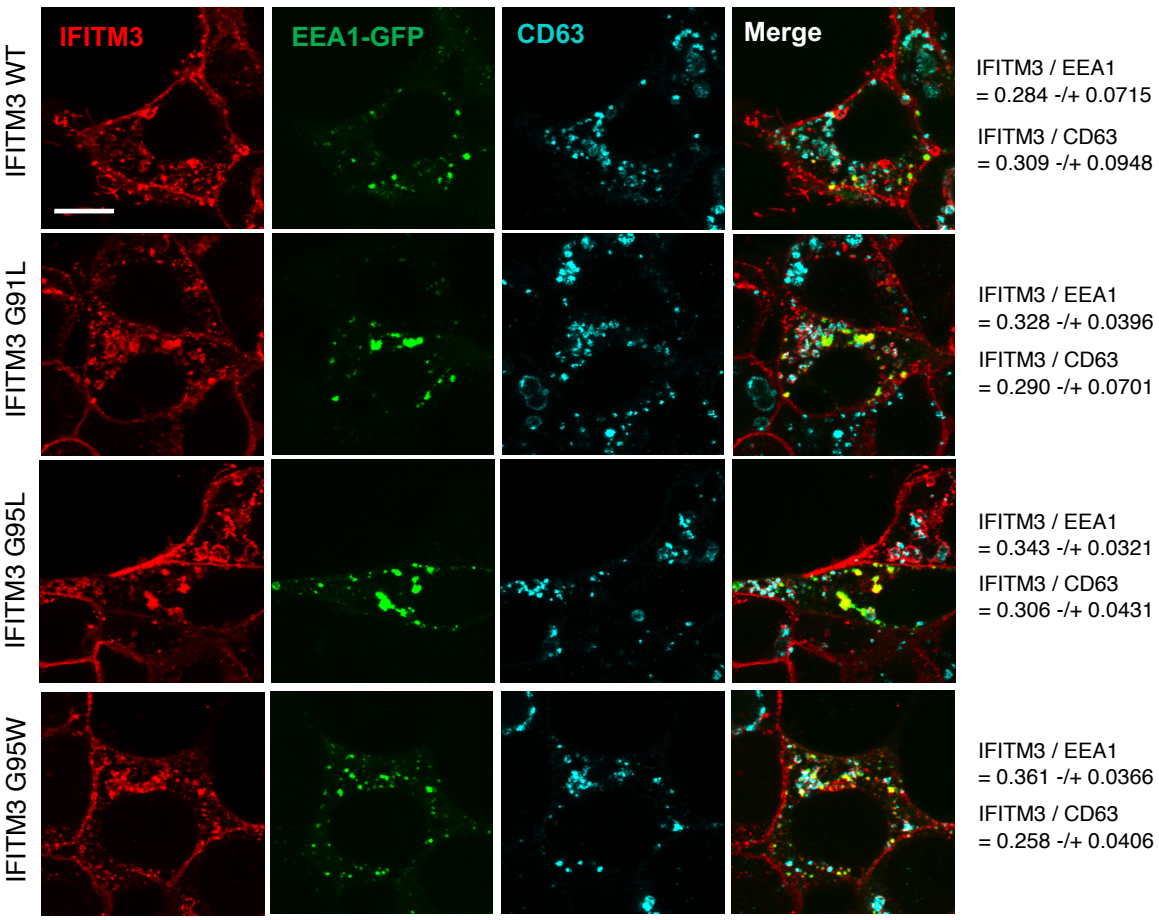

B

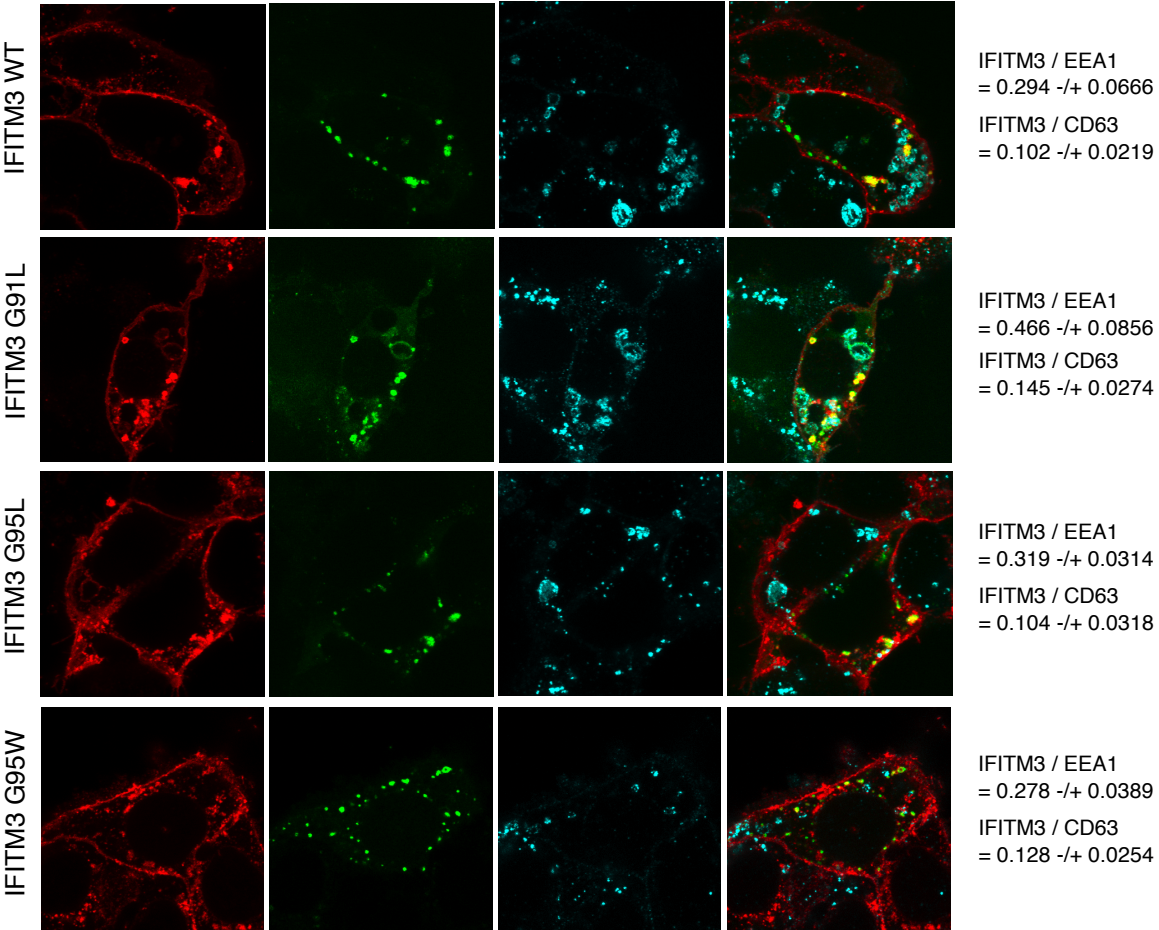

Supplement: supp [file elife-58537-supp-v1.zip]
